# Supplementary material for: Answering Clinical Questions Using Machine Learning: Should We Look at Diastolic Blood Pressure When Tailoring Blood Pressure Control?
Source: MDPI journal article supplement (doi:10.3390/jcm11247454), 2022-12-15
Supplement: s1 [file s1]

## Supplemental Material

Table S1. Baseline characteristics of the Systolic Blood Pressure Intervention Trial (SPRINT)

participants, according to the treatment group.

|                                                                     | Intensive treatment | Standard treatment | P-value |
|---------------------------------------------------------------------|---------------------|--------------------|---------|
| N                                                                   | 4678                | 4683               |         |
| Age, years                                                          | 67.9 (9.4)          | 67.9 (9.5)         | 0.9     |
| Female, %                                                           | 1684 (36)           | 1648 (35.2)        | 0.43    |
| Black race, %                                                       | 1454 (31.1)         | 1493 (31.9)        | 0.42    |
| History of cardiovascular disease, %                                | 940 (20.1)          | 937 (20)           | 0.9     |
| History of chronic kidney disease, %                                | 1330 (28.4)         | 1316 (28.1)        | 0.7     |
| Body mass index, kg/m <sup>2</sup>                                  | 29.9 (5.8)          | 29.8 (5.7)         | 0.40    |
| Systolic blood pressure, mmHg                                       | 139.7 (15.8)        | 139.7 (15.4)       | 0.97    |
| Diastolic blood pressure, mmHg                                      | 78.2 (11.9)         | 78 (12)            | 0.48    |
| Current smoker, %                                                   | 639 (13.7)          | 601 (12.8)         | 0.25    |
| Estimated glomerular filtration rate,<br>ml/min/1.73 m <sup>2</sup> | 71.8 (20.7)         | 71.7 (20.5)        | 0.9     |
| Plasma glucose, fasting, mg/dl                                      | 99 (14)             | 99 (13)            | 0.9     |
| Total cholesterol, mg/dl                                            | 190.2 (41.4)        | 190 (41)           | 0.9     |
| High density lipoprotein cholesterol,<br>mg/dl                      | 52.9 (14.3)         | 55 (14.6)          | 0.7     |
| Triglycerides, mg/dl                                                | 125 (86)            | 127 (95)           | 0.22    |
| On aspirin, %                                                       | 2406 (51.6)         | 2350 (50.4)        | 0.23    |
| On statin, %                                                        | 1978 (42.6)         | 2076 (44.7)        | 0.038   |

Variables are presented as mean values, standard deviation or number, followed by percentage.

Table S2. The Systolic Blood Pressure Intervention Trial (SPRINT) outcomes.

|                                                             | Intensive treatment | Standard treatment | p-value |
|-------------------------------------------------------------|---------------------|--------------------|---------|
| N                                                           | 4678                | 4683               |         |
| Mean in-trial systolic blood pressure, mmHg                 | 123.5 (8.6)         | 135.3 (7.2)        | <0.001  |
| Mean in-trial diastolic blood pressure, mmHg                | 69.1 (8.4)          | 75.1 (9.1)         | <0.001  |
| Original primary SPRINT composite endpoint, %               | 243 (5.2)           | 319 ( 6.8 )        | 0.001   |
| Redefined clinical composite endpoint*, %                   | 204 (4.4)           | 257 (5.5)          | 0.012   |
| Myocardial infarction, %                                    | 97 (2.1)            | 116 ( 2.5 )        | 0.22    |
| Acute coronary syndrome other than myocardial infarction, % | 40 (0.9)            | 40 ( 0.9 )         | 0.99    |
| Stroke, %                                                   | 62 (1.3)            | 70 ( 1.5 )         | 0.5     |
| Acute exacerbation of heart failure, %                      | 62 (1.3)            | 100 ( 2.1 )        | 0.003   |
| Cardiovascular death, %                                     | 37 (0.8)            | 65 ( 1.4 )         | 0.007   |
| Overall death, %                                            | 155 (3.3)           | 210 ( 4.5 )        | 0.004   |

Variables are presented as mean values, standard deviation or number, followed by percentage.

\* In this report the composite clinical endpoint was redefined (by excluding acute exacerbation of heart failure, as compared to the original SPRINT report) as myocardial infarction, acute coronary syndrome other than myocardial infarction, stroke and cardiovascular death.
